1 **Gut microbiome disturbances of altricial Blue and Great tit nestlings are countered by**  
2 **continuous microbial inoculations from parental microbiomes**

3

4 Running title: Parental effects negate microbiome disruptions in nestlings

5

6 David Diez-Méndez<sup>1\*a</sup>, Kasun H. Bodawatta<sup>2\*</sup>, Inga Freiberga<sup>1</sup>, Irena Klečková<sup>1</sup>, Knud A.  
7 Jønsson<sup>2</sup>, Michael Poulsen<sup>3</sup>, and Katerina Sam<sup>1,4</sup>

8

9 <sup>1</sup> Biology Centre of Czech Academy of Sciences, Institute of Entomology, České Budějovice,  
10 Czech Republic

11 <sup>2</sup> Natural History Museum of Denmark, University of Copenhagen, Copenhagen, Denmark

12 <sup>3</sup> Section for Ecology and Evolution, Department of Biology, University of Copenhagen,  
13 Copenhagen, Denmark

14 <sup>4</sup> Faculty of Science, University of South Bohemia, České Budějovice, Czech Republic

15 \* These authors contributed equally to this work

16 <sup>a</sup> Corresponding author: david.diezmendez@gmail.com

17

18

## 19 **Abstract**

20 Gut microbial communities are complex and heterogeneous and play critical roles for animal  
21 hosts. Early-life disruptions to microbiome establishment can negatively impact host fitness  
22 and development. However, the consequences of such early-life disruptions are unknown in  
23 wild birds. To help fill this gap, after validating the disruptive influence of antibiotic and  
24 probiotic treatments on the gut microbiome in adult Great tits (*Parus major*) (efficacy  
25 experiment), we investigated the effect of continuous early-life gut microbiome disruptions on  
26 the establishment and development of gut communities in wild Great and Blue tit (*Cyanistes*  
27 *caeruleus*) nestlings (field experiment). Despite negative impacts of treatments on microbial  
28 alpha and beta diversities in the efficacy experiment, treatment did not affect the composition  
29 of nestling microbiomes in the field experiment. Independent of treatment, nestling gut  
30 microbiomes of both species grouped by brood, sharing high numbers of bacterial taxa with  
31 both the nest environment and their mother. The distance between nests increased inter-brood  
32 microbiome dissimilarity, but only in Great tits, indicating species-specific influence of  
33 environment on microbiomes. The strong maternal effect, driven by continuous recolonization  
34 from the nest environment and vertical transfer of microbes during feeding thus appear to  
35 provide resilience towards early-life disruptions in nestling gut microbiomes.

36

37 **Key Words:** antibiotics, probiotics, brood feeding, vertical transmission, environmental  
38 microbiomes, *Parus major*, *Cyanistes caeruleus*

39

## 40 **Introduction**

41 Complex and heterogeneous gut microbial communities affect vertebrate host physiology,  
42 development and behavior, with ramifications for host ecology and evolution [1–5]. Early-life  
43 establishment of a functioning consortium of gut symbionts is critical for microbiome structure

44 and function later in life [6–8]. Consequently, disruptions to early-life microbiome assembly  
45 processes can negatively impact host fitness and health by altering immune system  
46 development, increasing the probability of autoimmune diseases, and reducing resistance to  
47 parasitic infections [3, 9–12]. Oviparous birds (class Aves) acquire their initial gut symbionts  
48 after hatching, although the sterile nature of eggs and the transfer of maternal microbiota during  
49 egg formation is still controversial [13]. Post-hatching, parental and nest microbiomes [14, 15]  
50 along with diet [7, 16–18] and habitat [19–23] are thought to be the major factors shaping avian  
51 gut microbiomes.

52

53 The drivers and trajectory of establishment of the avian gut microbiomes in early life could  
54 rely on developmental patterns, from precocial to altricial species. Precocial chicks leave the  
55 nest area and feed independently shortly after hatching, whereas altricial chicks spend the  
56 brooding period within the nest and are fed directly by the parents [24]. Thus, the gut  
57 microbiome establishment of precocial chicks tends to be strongly influenced by the feeding  
58 environment, resulting in similar microbiome structures within and between broods [25]. In  
59 contrast, gut microbiomes of altricial species tend to be more similar within than between  
60 broods [26–28], possibly influenced by mutually non-exclusive vertical transmission of  
61 bacteria from parents during feeding events [15, 17] and environmental transfer of  
62 microbiomes from food items and the nest [6, 29, 30].

63

64 Gut microbiome disruptions have been carried out for decades in the poultry industry by  
65 applying antibiotics [31, 32]. In recent years, probiotics [33] have been used as growth  
66 promoters, where treatments lead to an increase in weight gain and feed efficiency [34].  
67 Comparisons of treatment outcomes between poultry and wild birds are difficult, as living  
68 environments, diets and microbial communities of chickens have been selected by humans for

69 decades [5]. Nevertheless, the limited number of studies that have investigated the effect of  
70 antibiotic treatments on wild chick microbiomes have demonstrated an increase in growth rate  
71 (in Magellanic penguins *Spheniscus magellanicus* [35]), together with a higher food conversion  
72 efficiency (in House sparrows *Paser domesticus* [36]) similar to in poultry. However, our  
73 understanding of the resilience of wild bird gut microbiomes to disruptions at the  
74 developmental stage is still limited. Such knowledge is important to understand the stability of  
75 host-microbe associations and consequences of microbiome disruptions in a current global  
76 environment where anthropogenic stresses continuously influence wild bird microbiomes [37–  
77 40].

78

79 As a step toward filling this gap, we explored the resilience of nestling gut microbiome to  
80 disruptions induced by antibiotics or probiotics during the brooding period in two sympatric  
81 altricial passerine (order Passeriformes) species: the Blue tit (BT: *Cyanistes caeruleus*) and the  
82 Great tit (GT: *Parus major*). First, we confirmed the influence of antibiotics and probiotics on  
83 gut microbiomes of adult birds (efficacy experiment). Then, we applied antibiotics and  
84 probiotics to nestlings in the wild and characterized the cloacal microbiomes throughout the  
85 brooding period with MiSeq amplicon sequencing of the bacterial 16s rRNA gene. We  
86 hypothesized that applying antibiotic or probiotic treatments would disrupt gut microbiomes,  
87 and that treated chicks would harbor less diverse and compositionally different microbiomes  
88 compared to control and non-treated chicks. However, if the microbiome transfer from the  
89 parents or the nest environment outweighs the disruptions caused by treatments, we expect the  
90 microbiomes of the chicks to differ less between treatments, prevailing the brood effect [14,  
91 41].

92

93 **Materials and methods**

94 *Study species*

95 BTs and GTs are cavity-nesting passerines that readily accept nest-boxes for breeding [42].  
96 This facilitates sample collection and, to some extent, homogenization of pre-treatment  
97 breeding parameters [43]. Both species are dimorphic and monogamous, with females building  
98 the nest, and laying and incubating the eggs, while both parents feed the brood [42, 44, 45].  
99 BTs and GTs differ in body size [42] and therefore prey selection [46, 47], which is expected  
100 to affect gut microbiomes [23, 48].

101

102 *Testing the effects of antibiotics and probiotics (efficacy experiment)*

103 The use of antibiotics alters the gut microbial communities of passerine birds compared to  
104 controls [36]. To confirm that our treatments influence gut microbiomes of tits, we conducted  
105 an efficacy experiment investigating the effect of commonly used broad-spectrum antibiotic  
106 Doxycycline (Doxylgal 50mg/g) and probiotic *Lactobacillus fermentum* CCM7158 (Propigeon  
107 plv.) on ten GT adults, five per treatment. Experimental birds were mist-netted during winter  
108 2020 (December-January) in Branišov forest (48°58'48"N, 14°25'23"E) in České Budějovice  
109 (Czech Republic). Birds were ringed, sexed, weighed (Table S1), and transported into a  
110 breeding room at the Faculty of Sciences, University of South Bohemia, České Budějovice  
111 (day 0). GTs were housed in individual cages, given fresh water (including vitamins (Acidomid  
112 exot®) three times per week) and fed a standard daily diet following a well-established protocol  
113 [18]. We surface-sterilized diet content with a UV lamp for 20 min before feeding it to the  
114 birds in order to minimize microbial input.

115

116 We handled the experimental GTs once per day in the early morning. Treatment started on day  
117 1 and continued for three subsequent days (days 1-3). We supplied 0.5 mg of Doxylgal or 6.7  
118 mg of *Lactobacillus* probiotic per gram of body weight based on the weight at mist-netting,

119 following product instructions, diluted in 0.25 ml of water for an adequate oral administration  
120 with a syringe. Birds were weighed (electronic scale 0.01 g) and cloacal swabs were taken  
121 (minutip Flocked Swab FLOQSwab® 501CS01) from day 1 (initial non-treated microbiome)  
122 to day 4, and later on day 8. Additionally, we collected two samples of diets to investigate the  
123 potential diet-associated microbial transfer. The handling of GTs and food was strictly done  
124 wearing nitrile gloves (cleaned with 70% ethanol between birds). After taking the last sample  
125 on day 8, we released GTs back to their original mist-netting location. We preserved swabs in  
126 2 ml sterile vials filled with 100 µl of RNAlater® at -80°C until the DNA extractions.

127

### 128 *Manipulation of nestlings and sample collection (Field experiment)*

129 The field experiment was conducted in a nest-box population in Branišov forest. All nest-boxes  
130 were inspected during the last week of April 2020. From that day on, BT and GT clutches at  
131 the incubation stage were checked daily until hatching. The first ten nest-boxes of each species  
132 that successfully hatched were assigned to the experiment (hatching date for each nestling =  
133 day 1) (Fig. 1). The first six hatchlings in each nest (average number of hatchlings per nest ±  
134 SD: BT = 11.3 ± 1.25; GT = 8.9 ± 0.99) were randomly assigned in duplets to three treatments:  
135 antibiotic, probiotic, and control (day 1). The rest of the chicks in each nest-box remained  
136 untreated. We color-marked them with nontoxic pens for individual identification, took a  
137 cloacal swab and weighed them. In the field experiment we followed a slightly modified 16-  
138 day protocol compared with the efficacy experiment (Fig. 1). We changed the experimental  
139 procedure by administering the treatment every third day instead of daily, to avoid frequent  
140 disturbances in the nest. Control hatchlings were provided with water only (Table S2).  
141 Breeding parents were captured when entering their nest-boxes to feed the brood (day 10) by  
142 blocking the entrance of the nest-box. We sexed them based on plumage coloration and took a  
143 cloacal swab. Given the small size of the nestlings' cloaca, all swabs were lubricated by

144 immersing them in a vial filled with 2 ml of ultrapure water (IWA 20 IOL) just before use. We  
145 used separate vials per nest and visit and collected a water sample to control for potential  
146 microbiome transfer. Bird handling and storage of the cloacal samples was similar to the  
147 efficacy experiment.

148

#### 149 *DNA extractions and MiSeq amplicon sequencing*

150 DNA from cloacal swabs, food samples (from the efficacy experiment) and water samples used  
151 to lubricate swabs (field experiment) were extracted using Qiagen DNeasy blood and tissue  
152 kit® (Hilden, Germany) following an already validated protocol [49]. The presence of bacterial  
153 DNA in samples was validated using primers (SA511 and SB701) targeting bacterial 16S  
154 rRNA gene and samples were sequenced on an Illumina MiSeq platform at the Microbiome  
155 Core at University of Michigan.

156

#### 157 *Data analyses*

158 MiSeq amplicon sequences were cleaned and aligned using the DADA2 pipeline [50] within  
159 QIIME2 [51]. Sequences were clustered into amplicon sequence variants (ASVs) at 100%  
160 similarity and assigned to taxonomy using the SILVA 132 bacterial database [52]. All  
161 chimeric, archaeal, mitochondrial and chloroplast sequences were removed following the  
162 QIIME pipeline. We detected contamination in the water samples used to lubricate the cloacal  
163 swabs. These sequences were consistently found across samples and were removed from the  
164 full dataset. A rooted bacterial phylogeny was acquired using the *align-to-tree-mafft-fasttree*  
165 command in QIIME2. We also removed samples with less than 3,000 sequences from further  
166 analyses. Subsequent analyses were conducted separately for the efficacy and the field  
167 experiment.

168

169 Each dataset was rarefied using the sample with the smallest number of sequences (efficacy  
170 experiment: 5,158 and field experiment: 3,037) to correct for differences in sequencing depths  
171 using *rarefy\_even\_depth* function in the phyloseq package [53] (Tables S3 and S4) and  
172 subsequent analyses were conducted in R 4.0 [54]. Using the *diversity* function in the  
173 microbiome package [55], we calculated multiple alpha diversity matrices: observed ASV  
174 richness, Shannon's diversity index, and relative dominance (relative abundance of the most  
175 abundant bacterial taxa). We further calculated Faith's phylogenetic diversity of microbial  
176 communities using the picante package [56].

177

178 The effect of experimental treatments on body mass and alpha diversities in the efficacy  
179 experiment was assessed by building linear mixed-effect models (LMMs) using the lme4  
180 package [57]. We used treatment (antibiotics or probiotics), day of experiment (quadratic term  
181 via *poly* function), sex (male or female), and the interaction between treatment and day of  
182 experiment as fixed explanatory variables. Bird identity was used as a random intercept  
183 variable.

184

185 In the field experiment, we conducted separate analyses for BT and GT chicks. We investigated  
186 body mass and alpha diversities from day 1 to 16, by building models containing treatment  
187 (control, antibiotics or probiotics) and the day of the experiment (quadratic term via *poly*  
188 function) as fixed explanatory variables. We added brood identity as a variable with random  
189 intercept because of its grouping nature and modelled the repeatability of chick microbiome  
190 sampling with random slopes within day of experiment. We assessed tarsus length, as a proxy  
191 for size, at day 16, between all chick groups by building a LMM using the experimental  
192 category as a fixed factor (untreated, control, antibiotics, probiotics), and brood identity as a  
193 random variable. We additionally compared alpha diversity indexes between all chick groups,



194 adults and the nest microbial environment at day 16 (last day of experiment) using group as a  
195 fixed factor (untreated, control, antibiotics, probiotics, male, female and nest) and brood  
196 identity as a random variable. We also conducted analyses comparing alpha diversity indexes  
197 between chicks (pulling together the three experimental treatments) and nests at day 1 and at  
198 day 16 using group (nest and chick) and the day of the experiment as fixed factors, including  
199 their interaction, and brood identity as a random variable. Continuous explanatory variables  
200 were centered and, when necessary, the data were log or square root transformed (see Tables  
201 S5 and S6). We used the *r.squaredGLMM* function from MuMIn package [58] to compute  $R^2$   
202 values [59].

203

204 To investigate bacterial community structures (beta diversities) we used Bray-Curtis and  
205 weighted UniFrac (accounting for bacterial phylogeny) distances and visualized using non-  
206 metric multidimensional scaling (NMDS) and principal coordinate analysis (PCoA) plots. The  
207 influence of different treatment types and sample types were assessed using permutational  
208 multivariate analyses of variance (PERMANOVAs) with the *adonis2* function in the vegan  
209 package [60] with the “by” parameter set to “margin” to assess the marginal effect of the tested  
210 variables. Pairwise differences in microbial communities were investigated using the  
211 pairwiseAdonis wrapper package [61]. To investigate the effect of treatments on associations  
212 between microbes in the efficacy experiment, we calculated microbial co-occurrence networks  
213 with the *trans\_network* function in microeco package [62] using the SparCC method from the  
214 SpiecEasi package [63]. We filtered out ASVs with abundances below 1% from the data set  
215 and used 100 SparCC simulations. The network properties were calculated with the igraph  
216 package [64] and visualized using Gephi [65].

217

218 Similarly to alpha diversities, field experiment beta diversities were analyzed separately by  
219 host species, for manipulated chicks and for final day samples. To tease apart the parental  
220 transmission of microbiomes to chicks, we analyzed microbiomes between adults and 16-day  
221 old chicks (treated and untreated). We first evaluated the parental and environmental transfer  
222 of ASVs through characterizing shared and unique ASVs between adults (males and females),  
223 chicks, and nest environment using *UpSet* plots in the *UpSetR* package [66]. Secondly, we  
224 investigated the influence of parental and nest microbiomes on core microbiomes (consistent  
225 bacterial taxa) of nestlings using the *core* function in the *microbiome* package [55]. We  
226 assigned an ASV to the core if the ASV was found in abundances of a minimum of 0.001%  
227 across >50% of the samples in the same treatment group. We also examined the transfer of  
228 microbiomes from the nest through comparing the nest microbiomes with chicks on day 1 (the  
229 day a chick hatched), under the assumption that recently hatched chicks do not strongly  
230 influence nest microbiomes, but reversely, the nest environment may influence the bacterial  
231 communities in the chicks. We conducted similar analyses between chick and nest  
232 microbiomes of day 16 to investigate whether chick microbiomes converge similar to nest  
233 microbiomes at the end of the brooding period. We further investigated the influence of the  
234 distance between nests on microbiome similarity of chicks using a *mantel test* in the *vegan*  
235 package [60], to evaluate whether the proximity of nests (i.e., similar environmental conditions  
236 and diet availability) influence chick microbiomes. We used nest-box GPS coordinates (Table  
237 S7) to calculate the distances between them, using the *st\_distance* function from the *sf* package  
238 [67]. For this analysis we averaged the chick microbiomes from the final day from each nest.

239

## 240 **Results**

241 *Notable disruptions to adult gut microbiomes in the efficacy experiment*

242 In the efficacy experiment, 47 of the 50 samples passed the quality filtering steps and these  
243 samples contained overall 1 799 504 (average  $\pm$  SD = 38 287  $\pm$  25 372) bacterial sequences.  
244 These sequences were assigned to 4 886 ASVs. GTs lost body mass after 8 days in captivity  
245 (average  $\pm$  SD = 12.6 g  $\pm$  4.97%, n = 10), which is expected from the adaptation to laboratory  
246 conditions [68, 69]. Mass loss was only associated with the number of days since the beginning  
247 of the experiment (estimate  $\pm$  SE = -2.71  $\pm$  0.282, t = 9.623,  $p$  < 0.001), independent of treatment  
248 (estimate  $\pm$  SE = -0.05  $\pm$  0.270, t = -0.196,  $p$  = 0.850) (Fig. 2A). Observed ASV richness and  
249 Faith's phylogenetic diversity declined similarly in both antibiotic and probiotic treated  
250 individuals during the experiment (Figs. 2B, S1, and Table S3) while we did not detect any  
251 temporal pattern in Shannon's diversity index or relative dominance (Fig. S1, Table S3).

252

253 At the phylum level, Proteobacteria dominated the microbiomes (50.2%) followed by  
254 Bacteroidetes (17.2%), Tenericutes (27.5%), Actinobacteria (9.6%) and Firmicutes (5.2%)  
255 (Fig. S2). In both antibiotic and probiotic treated individuals, the relative abundance of  
256 Proteobacteria (Antibiotic: Initial = 56.2%, last day = 38.7%; Probiotic: Initial = 53.2%, last  
257 day = 25.3%) and Bacteroidetes (Antibiotic: Initial = 23.5%, last day = 12.5%; Probiotic: Initial  
258 = 22.8%, last day = 2.9%) decreased during the treatment time, while Tenericutes increased  
259 notably (Antibiotic: Initial = 4.3%, last day = 28.4%; Probiotic: Initial = 1.3%, last day =  
260 60.7%) (Fig. S2). In the probiotic treatment, the relative abundance of Firmicutes had increased  
261 from the first to the last day, potentially influenced by the inoculation of lactic-acid bacteria  
262 (Fig. S2). Microbial community compositions measured with either distance matrices were not  
263 significantly different between sampling days for both treatment groups (antibiotic <sub>(Bray-Curtis)</sub>:  
264  $F = 1.054$ ,  $R^2 = 0.1898$ ,  $p = 0.2516$ , antibiotic <sub>(UniFrac)</sub>:  $F = 1.227$ ,  $R^2 = 0.2143$ ,  $p = 0.1139$ ,  
265 probiotic <sub>(Bray-Curtis)</sub>:  $F = 1.196$ ,  $R^2 = 0.2012$ ,  $p = 0.1316$ , probiotic <sub>(UniFrac)</sub>:  $F = 1.036$ ,  $R^2 =$   
266  $0.1791$ ,  $p = 0.3719$ ; Fig. 2C). However, microbiomes on day 1 exhibited reduced interspecific

267 variation compared to the last day in both treatment groups (Fig 2C), indicating that antibiotic  
268 and probiotic treatments increase variability in microbiomes between individuals.

269

270 Microbial network analyses confirmed the effects of antibiotic and probiotic treatment on  
271 changing co-occurrence patterns of ASVs between days 1 and 8 (Fig. 1D). The number of  
272 ASVs in networks reduced during the period, while the proportion of negative associations  
273 between ASVs increased in both groups (Fig. 1D). Overall, this indicates that the influence of  
274 antibiotic and probiotic treatments on alpha and beta diversities of microbiomes lead to notable  
275 changes in structure of microbial networks.

276

277 We observed the presence of a few food-borne ASVs in the gut communities (Fig. S3A and  
278 B), but these ASVs were abundant, as community composition of food microbiomes were  
279 similar to some of the gut microbiomes (Fig. S3C). Removal of these food-borne microbes  
280 from the dataset did not influence overall community compositions or effects of antibiotic or  
281 probiotic treatment, so we retained them in the dataset.

282

283 *Treatment does not affect gut microbiomes of manipulated chicks in the wild*

284 In the field manipulation experiment, from chicks, we acquired 4 356 709 bacterial sequences  
285 from BTs ( $n = 203$ , average  $\pm$  SD:  $21\,461 \pm 10\,158$ ) and 6 179 421 sequences from GTs ( $n =$   
286  $257$ , average  $\pm$  SD:  $24\,044 \pm 11\,794$ ), and these sequences were assigned to 14 309 ASVs in  
287 BT and 18 796 ASVs in GT samples. Alpha diversity indexes of microbiomes increased overall  
288 during chick development in both species (except for the relative dominance index) with major  
289 changes occurring between day 1 and day 7 (Figs. 3, S4 and Table S4). Alpha diversity indexes  
290 showed a clear negative quadratic effect, stabilizing between day 10 and 16, following the  
291 decrease in body growth rate (Figs. 3 and S4). We did not find a clear effect of treatment on

292 the diversity matrices in BTs, but GTs showed a trend for higher observed ASV richness and  
293 Faith's phylogenetic diversity in antibiotic treated chicks than in controls (Fig. 3, Table S4,  
294 and S5).

295

296 The increase in body mass during development was similar in antibiotic and probiotic treated  
297 chicks as well as controls for both species (Fig. 3, Table S6). However, on day 16, GT probiotic  
298 treated chicks tended to be larger than untreated (estimate  $\pm$  SE =  $0.27 \pm 0.140$ , t-value = 1.933,  
299  $p = 0.057$ ) and antibiotic treated chicks (Table S7).

300

301 The microbiomes of manipulated chicks were dominated by Proteobacteria (BT: 37.6%, GT:  
302 38.1%), Firmicutes (BT: 19.1%, GT: 19.3%), Actinobacteria (BT: 18.1%, GT: 18.0%) and  
303 Bacteroidetes (BT: 17.8%, GT: 15.8%) bacterial phyla and the relative abundance of these  
304 phyla did not differ between days nor treatments (Fig. S5). The composition of microbiomes  
305 (beta diversity) was strongly affected by brood identity and sampling day (Fig. 4, Table 1),  
306 irrespective of the distance matrix used. Antibiotic or probiotic treatments did not strongly  
307 influence microbiome compositions in developing chicks (Table 1).

308

309 *Maternal microbial transfer is important for structuring chick microbiomes*

310 From adults, we acquired 283 044 sequences in BTs (males (n = 6):  $21\ 265 \pm 7\ 832$ ; females  
311 (n = 8):  $19\ 432 \pm 10\ 328$ ) and 272 345 sequences in GTs (males (n = 10):  $19\ 342 \pm 8\ 496$ ;  
312 females (n = 4):  $19\ 729 \pm 8\ 496$ ). Overall, the phylogenetic diversity of microbiomes did not  
313 differ between chicks at day 16 and adults in both species (Fig. 5A, and S6, Table S8). GT  
314 adult male microbiomes showed a lower bacterial richness and Shannon's diversity index,  
315 compared to chicks (Fig. 5A, and S6, Table S8). For adult BTs, we only found a lower  
316 Shannon's diversity index of both males and females than chicks (Fig. 5A, and S6, Table S8).

317

318 Of the bacterial ASVs shared between adults and chicks, females shared a higher number of  
319 unique ASVs with chicks (BT: 96, GT: 120) than males (BT: 29, GT: 74), indicating a strong  
320 effect of maternal microbiome transfer to chicks (Fig. 5B). Overall, core microbiomes were  
321 small in all groups, with chicks harboring a larger core microbiome than adults (Fig. 5C). The  
322 smaller core microbiomes in adults could be driven by environmental and dietary impacts on  
323 microbial variation and/or that fewer adults were examined than chicks [18, 70]. Despite small  
324 core microbiomes, chicks shared more core taxa with females (BT: 3 ASVs and GT: 5 ASVs)  
325 than males (1 ASV in both BT and GT) (Fig. 5C), underscoring the stronger maternal than  
326 paternal effect.

327

328 Adult microbiome compositions differed from the microbiomes of chicks on the last sampling  
329 day (Fig. S7A). Relative abundance of major bacterial phyla, such as Proteobacteria,  
330 Actinobacteria and Bacteroidetes, were comparable between adults and chicks (Fig. S7A).  
331 However, in both bird species, adult birds harbored a larger relative proportion of Tenericutes  
332 (BT females: 31.8%; males: 35.8%, chicks: 0.4%; GT females: 26.8%; males: 26.6%, chicks:  
333 1.2%), and a lower relative proportion of Firmicutes (BT females: 8.9%; males: 2.5%, chicks:  
334 11.4%; GT females: 6.6%; males: 3.5%, chicks: 25.4%) compared to all chicks on the last day  
335 (Fig. S7A).

336

337 Microbiome composition was significant different between treatment groups  
338 (PERMANOVA<sub>10,000 permutations</sub>: BT:  $F_6 = 1.408$ ,  $R^2 = 0.1166$ ,  $p < 0.0001$  and GT:  $F_6 = 1.728$ ,  
339  $R^2 = 0.0975$ ,  $p < 0.0001$ ) (Fig. S7B and C). The pair-wise comparisons confirmed the reduced  
340 influence of paternal microbiomes on the composition of chick microbiomes, as we observed  
341 differences in microbial community composition between males and chicks (Table S9). Female

342 microbiome composition did not differ from manipulated chicks but did differ from untreated  
343 chicks (Table S9). This suggests that disruptions to the microbiomes increased transfer of  
344 maternal microbes to treated chicks. Taken together, these results indicate that maternal  
345 transfer of microbes to developing chicks counter disturbances to developing microbiomes, but  
346 that only a subset of maternal microbes establish in chick guts.

347

#### 348 *Environmental transfer of microbiomes*

349 From the nest environment, we acquired 337 615 ( $n = 10$ ; average  $\pm$  SD =  $33\,762 \pm 15\,502$ )  
350 bacterial sequences from BTs and 323 275 ( $n = 10$ ;  $32\,328 \pm 13\,041$ ) from GTs on day 1, and  
351 200 844 sequences from BTs ( $n = 8$ ;  $25\,106 \pm 4\,372$ ) and 252 088 ( $n = 10$ ;  $25\,209 \pm 6\,478$ )  
352 from GTs on the day 16. Bacterial richness, Shannon's diversity and phylogenetic diversity of  
353 nest microbiomes did not differ between the sampling times for GTs, but BT nests increased  
354 in bacterial richness and phylogenetic diversity over time (Figs. 6, S8A and B, and Table S10).  
355 Nest beta diversity did not differ between days 1 and 16 for neither bird species (Fig. S8C).

356

357 Alpha diversities were significantly higher in nest microbiomes than chick gut microbiomes  
358 on day 1 (Fig. 6A and B and Table S10) and on day 16, except for phylogenetic diversity in  
359 GTs (Fig. 6A and B and Table S10). We observed increased microbial diversity in chicks  
360 towards the end of the brooding period compared to the hatching day. Microbial diversity in  
361 chicks on day 16 (just before fledging) became similar to their nests. The microbiome  
362 composition of BTs was significantly different between nests and one day old chicks  
363 (PERMANOVA<sub>10,000 permutations</sub>:  $F_1 = 1.581$ ,  $R^2 = 0.0307$ ,  $p = 0.0013$ ) (Fig. 6C). This was not  
364 the case for GTs (PERMANOVA<sub>10,000 permutations</sub>:  $F_1 = 1.078$ ,  $R^2 = 0.0211$ ,  $p = 0.2812$ ) (Fig.  
365 6D). Despite the significant difference between community composition of day 1 chicks and

366 nest microbiomes in BTs, the visual inspection of ordination plots indicated that this is driven  
367 by higher variability in chick microbiomes than nest microbiomes (Fig. 6C).

368

369 The similarity in average chick microbiome composition on day 1 (per brood) was not  
370 associated with distance between nests (Fig. 6E). This was retained in BTs until the last day of  
371 sampling (day 16) but there was a strong positive correlation between nest distance and gut  
372 microbiome dissimilarity in GTs on day 16 (Fig. 6F), suggesting that the effect of environment  
373 varies between species.

374

## 375 **Discussion**

376 Here we investigated the influence of continuous disruption on the establishment of the gut  
377 microbiomes during development in two altricial wild bird species. Despite the influence of  
378 antibiotic and probiotic treatments on gut microbiomes of adult birds, treatments did not  
379 negatively impact the diversity and composition of the gut microbiomes of nestlings during  
380 development. Consistent with previous studies [14, 26–28, 41], we observed a strong brood  
381 effect, driven by the continuous transfer of microbes from the parents and the potential transfer  
382 of microbes from the environment (e.g., nest and diet associated microbes). This underlines the  
383 importance of environmental and parental transfers, including rescue after disruption, for  
384 microbiomes in chicks with plausible influence on both their health and fitness later in life.

385

386 The strong within-brood similarity in chick gut microbiomes underlines the importance of  
387 parents in shaping offspring gut communities during the brooding period, through direct (e.g.,  
388 feeding events [71, 72]) and indirect (e.g., accumulation of parental microbes in the nest itself  
389 [14, 15]) microbial transfer. Parents usually take turns feeding the brood (10 to 40 individual  
390 feeding events per hour [46, 71–73]), with similar frequencies in males and females [74, 75].



391 This should ensure a continuous inoculation of parental microbes to chicks, leading to strong  
392 convergence of offspring gut microbiome within a brood, while counteracting disruptions to  
393 gut microbiomes during development. However, despite bi-parental care, we observed a  
394 stronger effect of maternal than paternal microbiomes on chick gut microbiomes (see also  
395 [27]). Females spend more time than males during nest building [42, 76], egg laying [77–79],  
396 incubation [80–82], and brooding [42, 83, 84], which could lead to a maternally biased  
397 shedding of microbes that can be acquired by the chicks. Indirect transfer of maternal microbes  
398 via nest environment has also been shown in Zebra finch chicks (*Taeniopygia guttata*) [15].  
399 Similar mechanisms are likely in both tit species we studied, as we observed comparably stable  
400 microbiomes within nests during the brooding period (Figs. 6A, B and S8), higher similarity  
401 of maternal and nest microbiomes than paternal and nest microbiomes (Fig. 5B and Table S8),  
402 and higher levels of microbiome sharing and convergence between chicks and nests during the  
403 brooding period (Fig. 5B).

404

405 The direct and indirect transfer of maternal microbiomes is likely essential for naturally  
406 developing chick microbiomes, as they may lose some gut symbionts due to diet and habitat  
407 changes, and during infections with natural pathogens or ones associated with anthropogenic  
408 activities [16, 23, 38, 85]. Skewed maternal microbial transfer may reduce competition between  
409 parental microbial symbionts sharing the same niches within offspring guts, with potential  
410 deleterious effects to chicks [86, 87]. However, male microbial symbionts are not completely  
411 lost during generational transmission, indicating that colonization of males does not necessarily  
412 mean a dead end for microbes. This may thus reflect a bet-hedging situation for optimal access  
413 to important symbionts, secured through biparental transfer. However, it appears more likely  
414 that the maternal-biased microbial transfer is derived mainly from the dominant role of females  
415 during the breeding period, implying that species with more equal biparental contribution

416 throughout the nest building, incubation and brooding periods should also exhibit more equal  
417 transfer of parental microbes to the next generation.

418

419 In GTs, nests located further from each other were more different in gut microbiome structure  
420 at the end of the brooding period, highlighting the joint impact of the microhabitat and diet on  
421 gut microbiomes. Surprisingly, we did not detect such an association in BTs. Previous work  
422 has shown that differences in habitat composition influence wild bird gut microbiomes [23],  
423 specifically, the microbiome similarity between prey and predator (caterpillar – tit) is higher  
424 when the prey is captured closer to the nest-box [17]. Our observed interspecific differences  
425 could originate from differential foraging behaviors or habitat quality of the proximal  
426 environment. Tits usually forage within a 25 m radius of the nest-box and increase travelling  
427 distances when resources are scarce [88]. GTs are larger and dominant over BTs in competing  
428 for nest-boxes [89, 90], which may lead GTs to select nest-boxes in higher-quality habitat  
429 patches compared to BTs. Consequently, GTs could forage closer to the nest, which reinforces  
430 the association between gut microbiomes and nest-box location. As a result, BT nests might be  
431 located in lower-quality habitat patches associated with longer foraging distances [73, 91],  
432 reducing the strength of the gut microbiome–location association. Alternatively, or in  
433 conjunction with habitat quality, GT is a more generalist species than BT [47, 92], and may be  
434 able to exploit multiple food resources near the nest. The more specialist BTs would have to  
435 forage further away if their preferred prey is scarce nearby, leading to a reduced influence of  
436 nest location on chick gut microbiomes. Overall, this indicates that nest location can also  
437 influence the gut microbiome composition of developing chicks, but this effect may depend on  
438 prey preference and foraging behavior of the species.

439

440 **Conclusions**

441 Disruptions to early-life establishment of gut microbiomes can have negative consequences for  
442 the development and fitness of animal hosts. Our gut microbiome manipulation study in natural  
443 environments highlights the resilience, yielded by parental feeding and environmental  
444 acquisition of microbes from nests, to disruptions of gut microbiomes during early life in two  
445 altricial bird species. Despite the counteracting effects of continuous transfer of maternal gut  
446 microbiomes during chick development, the influence of nest and diet-associated microbes  
447 indicate that chick microbiomes are still vulnerable to the introduction of new bacterial  
448 symbionts during brooding. If pathogenic, these newly arriving symbionts occupying niches  
449 opened-up by gut disruptions may hinder natural host microbial associations, affecting host  
450 development and compromising health. Altogether, our findings indicate that maternal-driven  
451 transfer of microbial symbionts is important for the establishment and stability of chick  
452 microbiomes, potentially affecting long-term associations between avian hosts and their gut  
453 symbionts.

454

#### 455 *Ethics declaration*

456 All the necessary permits were obtained for this experimental project: licence no. 1004 issued  
457 by the National Museum in Prague to capture wild birds, licence no. 43873/2019-MZE-18134  
458 issued by the Czech Ministry of Agriculture to house wild birds and licence no.  
459 MZP/2020/630/1544 granted by the Czech Ministry of Environment to conduct behavioural  
460 experiments with wild birds.

461

#### 462 *Availability of data and material*

463 Microbiome sequences are submitted to Sequence Read Archive database in GenBank  
464 (Efficacy experiment: PRJNA800248, Field experiment: PRJNA800611), and accession  
465 numbers of samples are available in Zenodo (doi: 10.5281/zenodo.6174091).

466

467 ***Competing interests***

468 The authors declare that they have no competing interests.

469

470 ***Acknowledgements***

471 This project and K.S., D.D-M., I.F. and I.K. were financially supported by the European  
472 Research Council Starting Grant BABE 805189. KAJ is grateful for the financial support  
473 received from the Villum Foundation (Young Investigator Programme, project no. 15560)  
474 and the Carlsberg Foundation (Distinguished Associate Professor Fellowship no. CF17-  
475 0248). We thank Dr. Petr Veselý and Dr. Michaela Syrová for their help mist-netting Great  
476 tits, and Dr. Pável Matos-Maraví for his help with housing birds.

477

478 ***Author contributions***

479 The study was conceived by K.S., K.B. and D.D-M., the efficacy and field experiment were  
480 carried out by I.F. and D.D-M.; I.K. carried out the laboratory work and K.B. and D.D-M.  
481 analyzed the data. K.B and D.D-M. led the writing of the manuscript, with inputs from I.F and  
482 I.K and critical contributions from K.A.J., M.P, and K.S.

483

484 ***References***

- 485 1. Heijtz RD, Wang S, Anuar F, Qian Y, Bjorkholm B, Samuelsson A, et al. Normal gut  
486 microbiota modulates brain development and behavior. *Proc Natl Acad Sci USA* 2011; **108**:  
487 3047–3052.
- 488 2. Alberdi A, Aizpurua O, Bohmann K, Zepeda-Mendoza ML, Gilbert MTP. Do  
489 vertebrate gut metagenomes confer rapid ecological adaptation? *Trends Ecol Evol* 2016; **31**:  
490 689–699.

- 491 3. Macke E, Tasiemski A, Massol F, Callens M, Decaestecker E. Life history and eco-  
492 evolutionary dynamics in light of the gut microbiota. *Oikos* 2017; **126**: 508–531.
- 493 4. Davidson GL, Raulo A, Knowles SCL. Identifying microbiome-mediated behaviour  
494 in wild vertebrates. *Trends Ecol Evol* 2020; **35**: 972–980.
- 495 5. Bodawatta KH, Hird SM, Grond K, Poulsen M, Jønsson KA. Avian gut microbiomes  
496 taking flight. *Trends Microbiol* 2022; **30**: 268–280.
- 497 6. Jacob S, Parthuisot N, Vallat A, Ramon-Portugal F, Helfenstein F, Heeb P.  
498 Microbiome affects egg carotenoid investment, nestling development and adult oxidative  
499 costs of reproduction in Great tits. *Funct Ecol* 2015; **29**: 1048–1058.
- 500 7. Davidson GL, Wiley N, Cooke AC, Johnson CN, Fouhy F, Reichert MS, et al. Diet  
501 induces parallel changes to the gut microbiota and problem solving performance in a wild  
502 bird. *Sci Rep* 2020; **10**: 20783.
- 503 8. Velando A, Noguera JC, Aira M, Domínguez J. Gut microbiome and telomere length  
504 in gull hatchlings. *Biol Lett* 2021; **17**: 20210398.
- 505 9. Gensollen T, Iyer SS, Kasper DL, Blumberg RS. How colonization by microbiota in  
506 early life shapes the immune system. *Science* 2016; **352**: 539–544.
- 507 10. Simon K, Verwoolde MB, Zhang J, Smidt H, de Vries Reilingh G, Kemp B, et al.  
508 Long-term effects of early life microbiota disturbance on adaptive immunity in laying hens.  
509 *Poultry Science* 2016; **95**: 1543–1554.
- 510 11. Knutie SA, Wilkinson CL, Kohl KD, Rohr JR. Early-life disruption of amphibian  
511 microbiota decreases later-life resistance to parasites. *Nat Commun* 2017; **8**: 86.
- 512 12. Kirschman LJ, Khadjinova A, Ireland K, Milligan-Myhre KC. Early life disruption of  
513 the microbiota affects organ development and cytokine gene expression in Threespine  
514 Stickleback. *Integr Comp Biol* 2020; icaa136.
- 515 13. Trevelline BK, MacLeod KJ, Knutie SA, Langkilde T, Kohl KD. *In ovo* microbial

- 516 communities: a potential mechanism for the initial acquisition of gut microbiota among  
517 oviparous birds and lizards. *Biol Lett* 2018; **14**: 20180225.
- 518 14. Teyssier A, Lens L, Matthysen E, White J. Dynamics of gut microbiota diversity  
519 during the early development of an avian host: Evidence from a cross-foster experiment.  
520 *Front Microbiol* 2018; **9**: 1524.
- 521 15. Chen C-Y, Chen C-K, Chen Y-Y, Fang A, Shaw GT-W, Hung C-M, et al. Maternal  
522 gut microbes shape the early-life assembly of gut microbiota in passerine chicks via nests.  
523 *Microbiome* 2020; **8**: 129.
- 524 16. Teyssier A, Matthysen E, Hudin NS, de Neve L, White J, Lens L. Diet contributes to  
525 urban-induced alterations in gut microbiota: experimental evidence from a wild passerine.  
526 *Proc R Soc B* 2020; **287**: 20192182.
- 527 17. Dion-Phénix H, Charmantier A, de Franceschi C, Bourret G, Kembel SW, Réale D.  
528 Bacterial microbiota similarity between predators and prey in a blue tit trophic network.  
529 *ISME J* 2021; **15**: 1098–1107.
- 530 18. Bodawatta KH, Freiberga I, Puzejova K, Sam K, Poulsen M, Jønsson KA. Flexibility  
531 and resilience of Great Tit (*Parus major*) gut microbiomes to changing diets. *Anim*  
532 *microbiome* 2021; **3**: 20.
- 533 19. Hird SM, Carstens BC, Cardiff SW, Dittmann DL, Brumfield RT. Sampling locality  
534 is more detectable than taxonomy or ecology in the gut microbiota of the brood-parasitic  
535 Brown-headed Cowbird (*Molothrus ater*). *PeerJ* 2014; **2**: e321.
- 536 20. Grond K, Santo Domingo JW, Lanctot RB, Jumpponen A, Bentzen RL, Boldenow  
537 ML, et al. Composition and drivers of gut microbial communities in arctic-breeding  
538 shorebirds. *Front Microbiol* 2019; **10**: 2258.
- 539 21. Loo WT, García-Loor J, Dudaniec RY, Kleindorfer S, Cavanaugh CM. Host  
540 phylogeny, diet, and habitat differentiate the gut microbiomes of Darwin's finches on Santa

- 541 Cruz Island. *Sci Rep* 2019; **9**: 18781.
- 542 22. Herder EA, Spence AR, Tingley MW, Hird SM. Elevation correlates with significant  
543 changes in relative abundance in hummingbird fecal microbiota, but composition changes  
544 little. *Front Ecol Evol* 2021; **8**: 597756.
- 545 23. Drobnik SM, Cichoń M, Janas K, Barczyk J, Gustafsson L, Zagalska-Neubauer M.  
546 Habitat shapes diversity of gut microbiomes in a wild population of blue tits *Cyanistes*  
547 *caeruleus*. *J Avian Biol* 2021; jav.02829.
- 548 24. Starck JM, Ricklefs RE. Patterns of development: The Altricial-Precocial spectrum.  
549 In: Starck JM, Ricklefs RE (eds). *Avian growth and development. Evolution within the*  
550 *altricial-precocial spectrum*. 1998. Oxford University Press, New York, pp 2–30.
- 551 25. Grond K, Lanctot RB, Jumpponen A, Sandercock BK. Recruitment and establishment  
552 of the gut microbiome in arctic shorebirds. *FEMS Microbiol Ecol* 2017; **93**: fix142.
- 553 26. Benskin CMcWH, Rhodes G, Pickup RW, Mainwaring MC, Wilson K, Hartley IR.  
554 Life history correlates of fecal bacterial species richness in a wild population of the blue tit  
555 *Cyanistes caeruleus*. *Ecol Evol* 2015; **5**: 821–835.
- 556 27. Kreisinger J, Kropáčková L, Petrželková A, Adámková M, Tomášek O, Martin J-F, et  
557 al. Temporal stability and the effect of transgenerational transfer on fecal microbiota structure  
558 in a long distance migratory bird. *Front Microbiol* 2017; **8**: 50.
- 559 28. Davidson GL, Somers SE, Wiley N, Johnson CN, Reichert MS, Ross RP, et al. A  
560 time-lagged association between the gut microbiome, nestling weight and nestling survival in  
561 wild Great Tits. *J Anim Ecol* 2021; **90**: 989–1003.
- 562 29. Goodenough AE, Stallwood B, Dandy S, Nicholson TE, Stubbs H, Coker DG. Like  
563 mother like nest: similarity in microbial communities of adult female Pied Flycatchers and  
564 their nests. *J Ornithol* 2017; **158**: 233–244.
- 565 30. Devaynes A, Antunes A, Bedford A, Ashton P. Progression in the bacterial load

- 566 during the breeding season in nest boxes occupied by the Blue Tit and its potential impact on  
567 hatching or fledging success. *J Ornithol* 2018; **159**: 1009–1017.
- 568 31. Moore PR, Evenson A, Luckey TD, McCoy E, Elvehjem CA, Hart EB. Use of  
569 sulfasuxidine, streptothricin, and streptomycin in nutritional studies with the chick. *J Biol*  
570 *Chem* 1946; **165**: 437–441.
- 571 32. Jukes TH, Williams WL. Nutritional effects of antibiotics. *Pharmacol Rev* 1953; **5**:  
572 381–420.
- 573 33. Reuben RC, Roy PC, Sarkar SL, Alam R-U, Jahid IK. Isolation, characterization, and  
574 assessment of lactic acid bacteria toward their selection as poultry probiotics. *BMC Microbiol*  
575 2019; **19**: 253.
- 576 34. Dumonceaux TJ, Hill JE, Hemmingsen SM, Van Kessel AG. Characterization of  
577 intestinal microbiota and response to dietary Virginiamycin supplementation in the broiler  
578 chicken. *Appl Environ Microbiol* 2006; **72**: 2815–2823.
- 579 35. Potti J, Moreno J, Yorio P, Briones V, García-Borboroglu P, Villar S, et al. Bacteria  
580 divert resources from growth for Magellanic Penguin chicks: Bacteria affect penguin chick  
581 growth. *Ecol Lett* 2002; **5**: 709–714.
- 582 36. Kohl KD, Brun A, Bordenstein SR, Caviedes-Vidal E, Karasov WH. Gut microbes  
583 limit growth in house sparrow nestlings (*Passer domesticus*) but not through limitations in  
584 digestive capacity. *Integr Zool* 2018; **13**: 139–151.
- 585 37. Knutie SA. Food supplementation affects gut microbiota and immunological  
586 resistance to parasites in a wild bird species. *J Appl Ecol* 2020; **57**: 536–547.
- 587 38. Murray MH, Lankau EW, Kidd AD, Welch CN, Ellison T, Adams HC, et al. Gut  
588 microbiome shifts with urbanization and potentially facilitates a zoonotic pathogen in a  
589 wading bird. *PLoS ONE* 2020; **15**: e0220926.
- 590 39. Berlow M, Phillips JN, Derryberry EP. Effects of urbanization and landscape on gut



- 591 microbiomes in White-Crowned Sparrows. *Microb Ecol* 2021; **81**: 253–266.
- 592 40. Berlow M, Wada H, Derryberry EP. Experimental exposure to noise alters gut  
593 microbiota in a captive songbird. *Microb Ecol* 2021; <https://doi.org/10.1007/s00248-021->  
594 01924-3.
- 595 41. Lucas FS, Heeb P. Environmental factors shape cloacal bacterial assemblages in  
596 Great Tit *Parus major* and Blue Tit *P. caeruleus* nestlings. *J Avian Biol* 2005; **36**: 510–516.
- 597 42. Perrins CM. British tits. 1979. HarperCollins, London.
- 598 43. Møller AP, Adriaensen F. Variation in clutch size in relation to nest size in birds. *Ecol*  
599 *Evol* 2014; **4**: 3583–3595.
- 600 44. Gibb J. The breeding biology of the Great and Blue Titmice. *Ibis* 1950; **92**: 507–539.
- 601 45. Perrins CM. Tits and their caterpillar food supply. *Ibis* 1991; **133**: 49–54.
- 602 46. García-Navas V, Ferrer ES, Sanz JJ. Prey choice, provisioning behaviour, and effects  
603 of early nutrition on nestling phenotype of titmice. *Écoscience* 2013; **20**: 9–18.
- 604 47. Barrientos R, Bueno-Enciso J, Sanz JJ. Hatching asynchrony vs. foraging efficiency:  
605 the response to food availability in specialist vs. generalist tit species. *Sci Rep* 2016; **6**:  
606 37750.
- 607 48. Bodawatta KH, Klečková I, Klečka J, Pužejová K, Koane B, Poulsen M, et al.  
608 Specific gut bacterial responses to natural diets of tropical birds. *Sci Rep* 2022; **12**: 713.
- 609 49. Bodawatta KH, Puzejova K, Sam K, Poulsen M, Jønsson KA. Cloacal swabs and  
610 alcohol bird specimens are good proxies for compositional analyses of gut microbial  
611 communities of Great Tits (*Parus major*). *Anim microbiome* 2020; **2**: 9.
- 612 50. Callahan BJ, McMurdie PJ, Rosen MJ, Han AW, Johnson AJA, Holmes SP. DADA2:  
613 High-resolution sample inference from Illumina amplicon data. *Nat Methods* 2016; **13**: 581–  
614 583.
- 615 51. Bolyen E, Rideout JR, Dillon MR, Bokulich NA, Abnet CC, Al-Ghalith GA, et al.

- 616 Reproducible, interactive, scalable and extensible microbiome data science using QIIME 2.  
617 *Nat Biotechnol* 2019; **37**: 852–857.
- 618 52. Quast C, Pruesse E, Yilmaz P, Gerken J, Schweer T, Yarza P, et al. The SILVA  
619 ribosomal RNA gene database project: improved data processing and web-based tools.  
620 *Nucleic Acids Res* 2012; **41**: 590–596.
- 621 53. McMurdie PJ, Holmes S. phyloseq: An R package for reproducible interactive  
622 analysis and graphics of microbiome census data. *PLoS ONE* 2013; **8**: e61217.
- 623 54. R Core Team. R: A language and environment for statistical computing. 2021. R  
624 Foundation for Statistical Computing, Viena, Austria.
- 625 55. Lahti L, Shetty S. Tools for microbiome analysis in R. 2017.
- 626 56. Kembel SW, Cowan PD, Helmus MR, Cornwell WK, Morlon H, Ackerly DD, et al.  
627 Picante: R tools for integrating phylogenies and ecology. *Bioinformatics* 2010; **26**: 1463–  
628 1464.
- 629 57. Bates D, Maechler M, Bolker BM, Walker S. Fitting linear mixed-effects models  
630 using lme4. *J Stat Softw* 2015; **67**: 1–48.
- 631 58. Bartón K. MuMIn: multi-model inference. 2015. R package.
- 632 59. Nakagawa S, Schielzeth H. A general and simple method for obtaining R<sup>2</sup> from  
633 generalized linear mixed-effects models. *Methods Ecol Evol* 2013; **4**: 133–142.
- 634 60. Oksanen J, Blanchet FG, Friendly M, Kindt R, Legendre P, McGlinn D, et al. vegan:  
635 Community Ecology Package. 2020.
- 636 61. Arbizu PM. pairwiseAdonis: Pairwise multilevel comparison using adonis. 2018.
- 637 62. Liu C, Cui Y, Li X, Yao M. *microeco* : an R package for data mining in microbial  
638 community ecology. *FEMS Microbiol Ecol* 2021; **97**: fiae255.
- 639 63. Kurtz ZD, Müller CL, Miraldi ER, Littman DR, Blaser MJ, Bonneau RA. Sparse and  
640 Compositionally Robust Inference of Microbial Ecological Networks. *PLoS Comput Biol*

- 641 2015; **11**: e1004226.
- 642 64. Csardi G, Nepusz T. The igraph software package for complex network research. *Int J*  
643 *Complex Syst* 2006; **1695**: 1–9.
- 644 65. Bastian M, Heymann S, Jacomy M. Gephi: an open source software for exploring and  
645 manipulating networks. 2009.
- 646 66. Conway JR, Lex A, Gehlenborg N. UpSetR: an R package for the visualization of  
647 intersecting sets and their properties. *Bioinformatics* 2017; **33**: 2938–2940.
- 648 67. Pebesma E. Simple Features for R: Standardized Support for Spatial Vector Data. *The*  
649 *R Journal* 2018; **10**: 439.
- 650 68. Krams I, Vrublevska J, Cirule D, Kivleniece I, Krama T, Rantala MJ, et al. Stress,  
651 behaviour and immunity in wild caught wintering Great Tits (*Parus major*). *Ethology* 2013;  
652 10.
- 653 69. Fischer CP, Wright-Lichter J, Romero LM. Chronic stress and the introduction to  
654 captivity: How wild house sparrows (*Passer domesticus*) adjust to laboratory conditions. *Gen*  
655 *Comp Endocrinol* 2018; **259**: 85–92.
- 656 70. Bodawatta KH, Koane B, Maiah G, Sam K, Poulsen M, Jønsson KA. Species-specific  
657 but not phyllosymbiotic gut microbiomes of New Guinean 2 passerines are shaped by diet and  
658 flight-associated gut modifications. *Proc R Soc Lond B* 2021; **288**: 20210446.
- 659 71. Hinde CA, Kilner RM. Negotiations within the family over the supply of parental  
660 care. *Proc R Soc B* 2007; **274**: 53–60.
- 661 72. Wilkin TA, King LE, Sheldon BC. Habitat quality, nestling diet, and provisioning  
662 behaviour in great tits *Parus major*. *J Avian Biol* 2009; **40**: 135–145.
- 663 73. Tremblay I, Thomas D, Blondel J, Perret P, Lambrechts MM. The effect of habitat  
664 quality on foraging patterns, provisioning rate and nestling growth in Corsican Blue Tits  
665 *Parus caeruleus*. *Ibis* 2004; **147**: 17–24.

- 666 74. Dickens M, Berridge D, Hartley IR. Biparental care and offspring begging strategies:  
667 hungry nestling blue tits move towards the father. *Anim Behav* 2008; **75**: 167–174.
- 668 75. Santema P, Schlicht E, Kempenaers B. Testing the conditional cooperation model:  
669 what can we learn from parents taking turns when feeding offspring? *Front Ecol Evol* 2019;  
670 **7**: 94.
- 671 76. Mainwaring MC. Causes and consequences of intraspecific variation in nesting  
672 behaviors: Insights from Blue Tits and Great Tits. *Front Ecol Evol* 2017; **5**: 39.
- 673 77. Pendlebury CJ, Bryant DM. Night-time behaviour of egg-laying tits. *Ibis* 2005; **147**:  
674 342–345.
- 675 78. Lord AM, McCleery RH, Cresswell W. Incubation prior to clutch completion  
676 accelerates embryonic development and so hatch date for eggs laid earlier in a clutch in the  
677 Great Tit *Parus major*. *J Avian Biol* 2011; **42**: 187–191.
- 678 79. Diez-Méndez D, Sanz JJ, Barba E. Impacts of ambient temperature and clutch size on  
679 incubation behaviour onset in a female-only incubator songbird. *Ibis* 2021; **163**: 1056–1071.
- 680 80. Nilsson J-Å. Time-dependent reproductive decisions in the blue tit. *Oikos* 2000; **88**:  
681 351–361.
- 682 81. Bambini G, Schlicht E, Kempenaers B. Patterns of female nest attendance and male  
683 feeding throughout the incubation period in Blue Tits *Cyanistes caeruleus*. *Ibis* 2019; **161**:  
684 50–65.
- 685 82. Diez-Méndez D, Cooper CB, Sanz JJ, Verdejo J, Barba E. Deconstructing incubation  
686 behaviour in response to ambient temperature over different timescales. *J Avian Biol* 2021;  
687 jav.02781.
- 688 83. Rodríguez S, Barba E. Nestling growth is impaired by heat stress: an experimental  
689 study in a mediterranean Great Tit population. *Zool Stud* 2016; **55**: 40.
- 690 84. Andreasson F, Nord A, Nilsson J-Å. Brood size constrains the development of

- 691 endothermy in blue tits. *J Exp Biol* 2016; **219**: 2212–2219.
- 692 85. Hird SM, Ganz H, Eisen JA, Boyce WM. The cloacal microbiome of five wild duck  
693 species varies by species and influenza A virus infection status. *mSphere* 2018; **3**: e00382-18.
- 694 86. Constable GWA, Fagan B, Law R. Maternal transmission as a symbiont sieve, and the  
695 absence of lactation in male mammals. 2022. <https://doi.org/10.1101/2022.01.10.475639>.
- 696 87. Frank SA. Host–symbiont conflict over the mixing of symbiotic lineages. *Proc R Soc*  
697 *Lond B* 1996; **263**: 339–344.
- 698 88. Naef-Daenzer B. Patch time allocation and patch sampling by foraging great and blue  
699 tits. *Anim Behav* 2000; **59**: 989–999.
- 700 89. Minot EO, Perrins CM. Interspecific interference competition - nest sites for blue and  
701 great tits. *J Anim Ecol* 1986; **55**: 331–350.
- 702 90. Kempenaers B, Dhondt AA. Competition between Blue and Great tit for roosting sites  
703 in winter: an aviary experiment. *Ornis Scand* 1991; **22**: 73–75.
- 704 91. Stauss MJ, Burkhardt JF, Tomiuk J. Foraging flight distances as a measure of parental  
705 effort in blue tits *Parus caeruleus* differ with environmental conditions. *J Avian Biol* 2005;  
706 **36**: 47–56.
- 707 92. Bañbura J, Lambrechts MM, Blondel J, Perret P, Cartan-Son M. Food handling time  
708 of blue tits chicks: constraints and adaptation to different prey types. *J Avian Biol* 1999; **30**:  
709 263–270.
- 710

711 **Table 1.** Influence of nest, treatment day and treatment on the composition of gut microbial  
 712 communities in the manipulated chicks based on permutational multivariate analyses of  
 713 variance (PERMNOVAs) tests. Analyses were conducted through measuring community  
 714 composition using both Bray-Curtis and weighted UniFrac distances.  
 715

| Species   | Distance matrix  | Variable  | F <sub>df</sub>     | R <sup>2</sup> | p      |
|-----------|------------------|-----------|---------------------|----------------|--------|
| Great tit | Bray-Curtis      | Nest      | 12.28 <sub>9</sub>  | 0.2976         | <0.001 |
|           |                  | Day       | 4.491 <sub>4</sub>  | 0.0484         | <0.001 |
|           |                  | Treatment | 0.8659 <sub>2</sub> | 0.0047         | 0.838  |
|           | Weighted UniFrac | Nest      | 2.594 <sub>9</sub>  | 0.0843         | <0.001 |
|           |                  | Day       | 2.739 <sub>4</sub>  | 0.0396         | <0.001 |
|           |                  | Treatment | 0.7775 <sub>2</sub> | 0.0056         | 0.911  |
| Blue tit  | Bray-Curtis      | Nest      | 7.461 <sub>9</sub>  | 0.2517         | <0.001 |
|           |                  | Day       | 2.542 <sub>4</sub>  | 0.0381         | <0.001 |
|           |                  | Treatment | 0.8697 <sub>2</sub> | 0.0065         | 0.887  |
|           | Weighted UniFrac | Nest      | 1.886 <sub>9</sub>  | 0.0797         | <0.001 |
|           |                  | Day       | 1.789 <sub>4</sub>  | 0.0381         | <0.001 |
|           |                  | Treatment | 0.7986 <sub>2</sub> | 0.0075         | 0.884  |

716

717

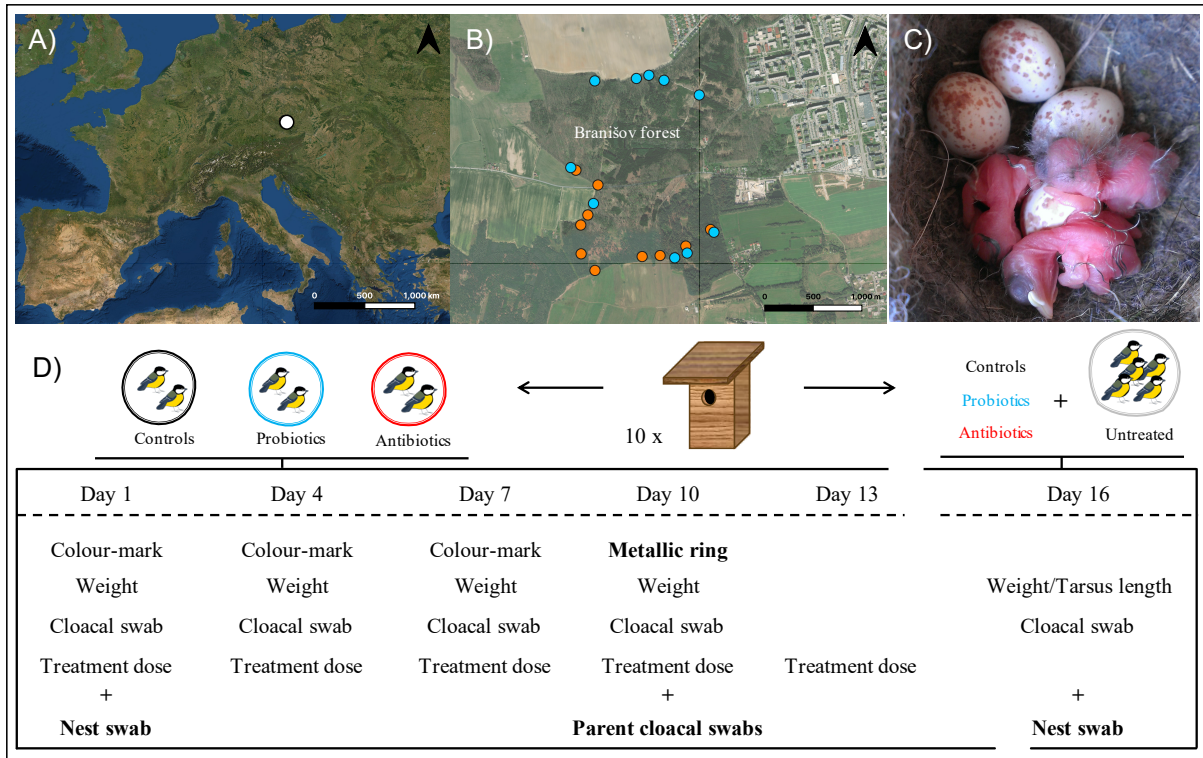

718

719

720

721

722

723

724

725

**Fig. 1. Location of the study site and schematic representation of the data collection in the field experiment.** (A) The location of the study site (white dot), (B) the distribution of the experimental nest-boxes (blue dots refer to experimental Blue tit nests, orange dots to experimental Great tits nests), (C) first Great tit hatchlings in a nest, and (D) the experimental procedure on chicks in both Great and Blue tit nests (illustrations only represent Great tits). Day 1 = nestling hatching day.

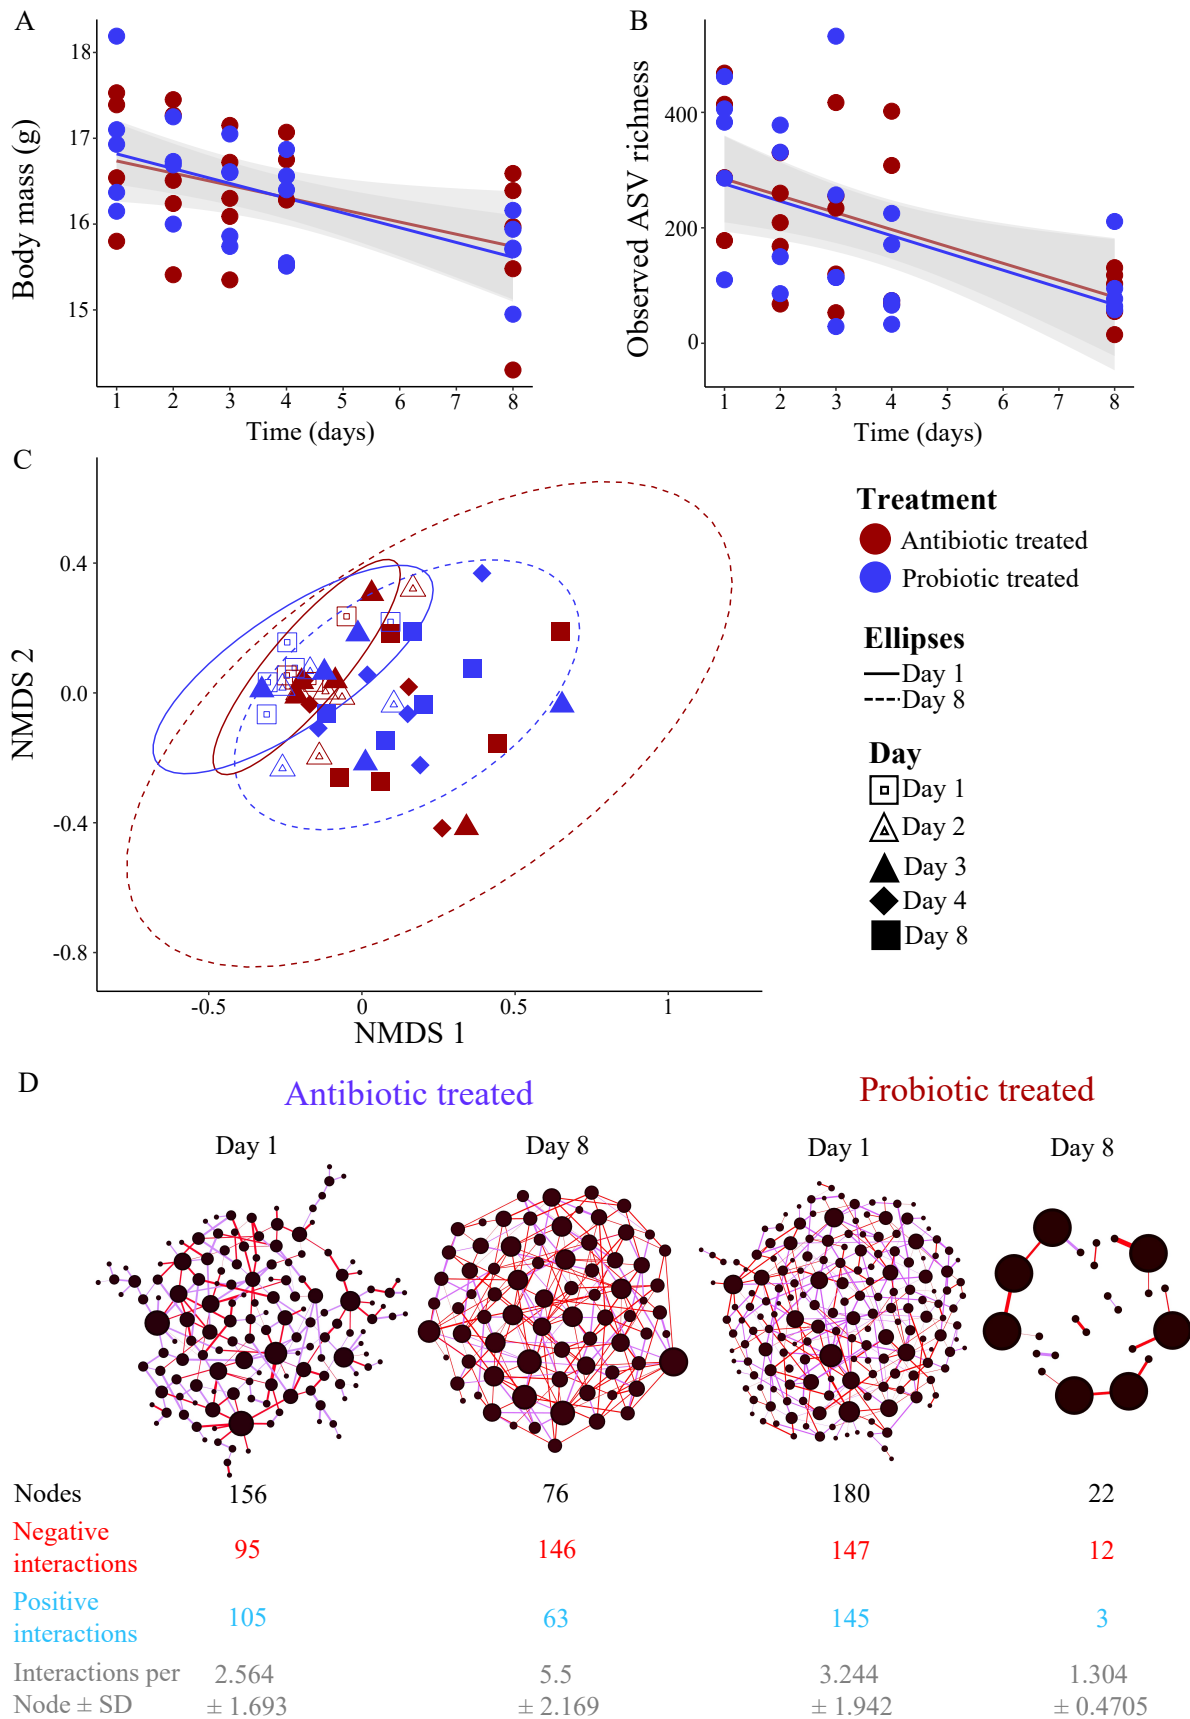

726

727

**Fig. 2. Antibiotic and probiotic treatments influence host body mass, and alpha and beta**



728 **diversities of microbiomes during the efficacy experiment.** (A) Decline in body mass during  
729 the efficacy experiment in both antibiotic and probiotic treated individuals. Standard errors for  
730 regression lines are indicated with grey shaded area. (B) Observed ASV richness of gut  
731 microbial communities decreased at the end of the treatment period compared to initial  
732 microbiomes. (C) Non-metric multidimensional scaling plot (NMDS) of the gut microbial  
733 communities of antibiotic and probiotic treated individuals (stress = 0.243). Individual  
734 microbiome variation was lower at the beginning of the experiment (Day 1: solid-line ellipse)  
735 in both treatment groups compared to the microbial variation at the end of the treatment (Day  
736 8: dashed-line ellipse). Ellipses represent 95% confident intervals of the data. (D) Microbial  
737 co-occurrence networks of initial microbiomes (Day 1) and at the last sampling day (Day 8)  
738 after the treatments. Nodes represent individual ASVs, and size correspond to the degree of the  
739 ASV (number of interactions each ASV have with other ASVs) in each network. Edges  
740 represent whether association are positive (blue) or negative (red). Network attributes are given  
741 below each network.

742

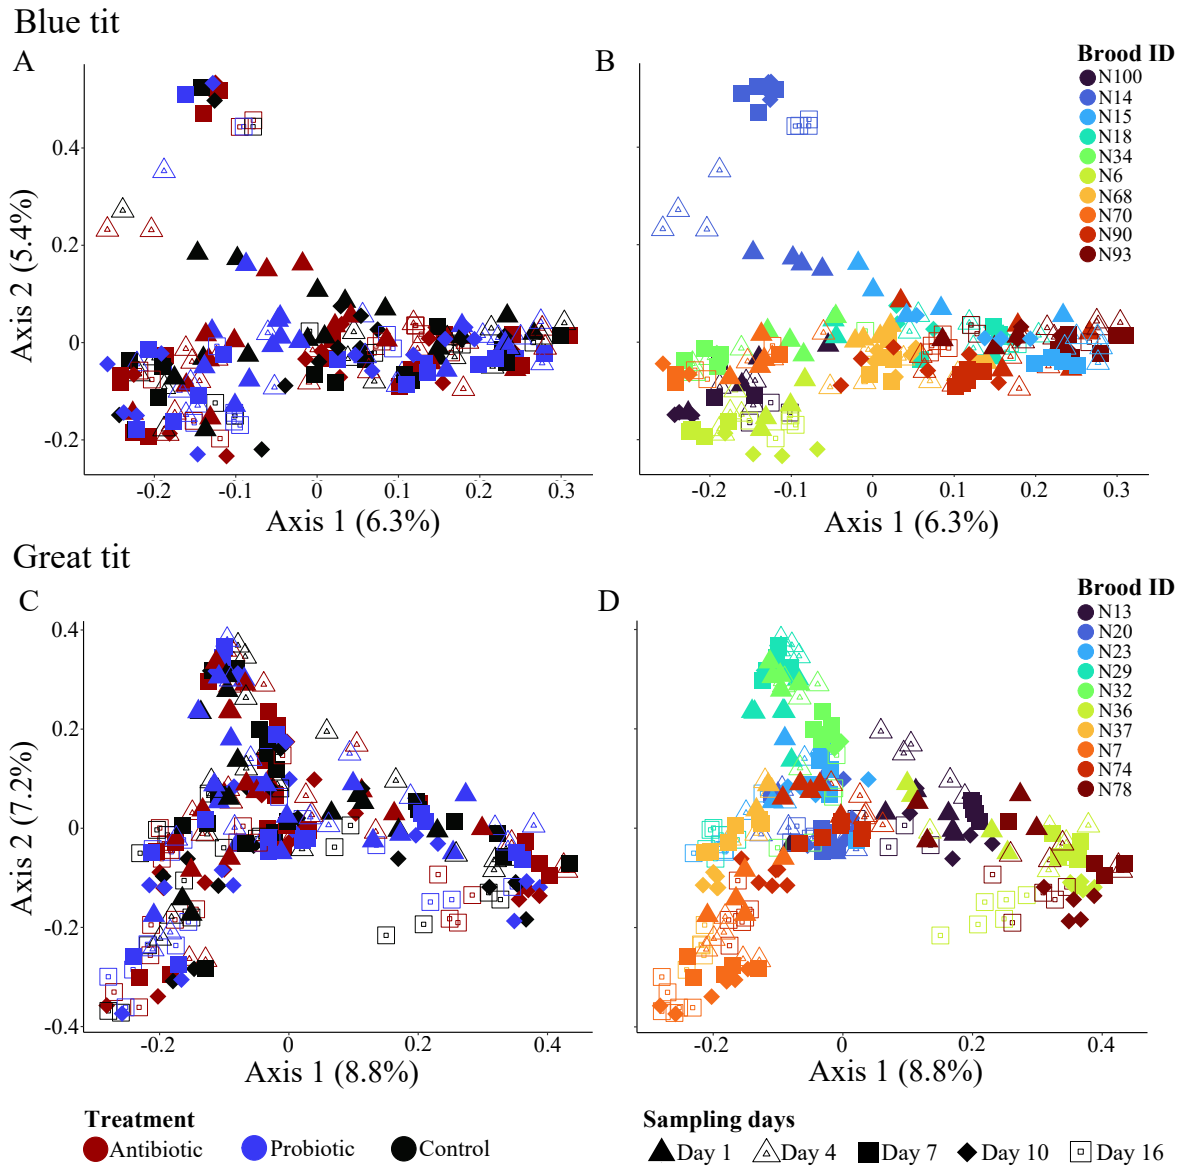

743

744

745

746

747

748

**Fig. 3. Growth rate and gut microbial alpha diversities did not differ between chicks in different treatment groups.** Body mass (A), observed ASV richness (B), and Faith's phylogenetic diversity (C) of microbiomes of manipulated chicks during the sampling period. Gray areas around the trend lines represent standard errors. Data points are colored according to the treatment.

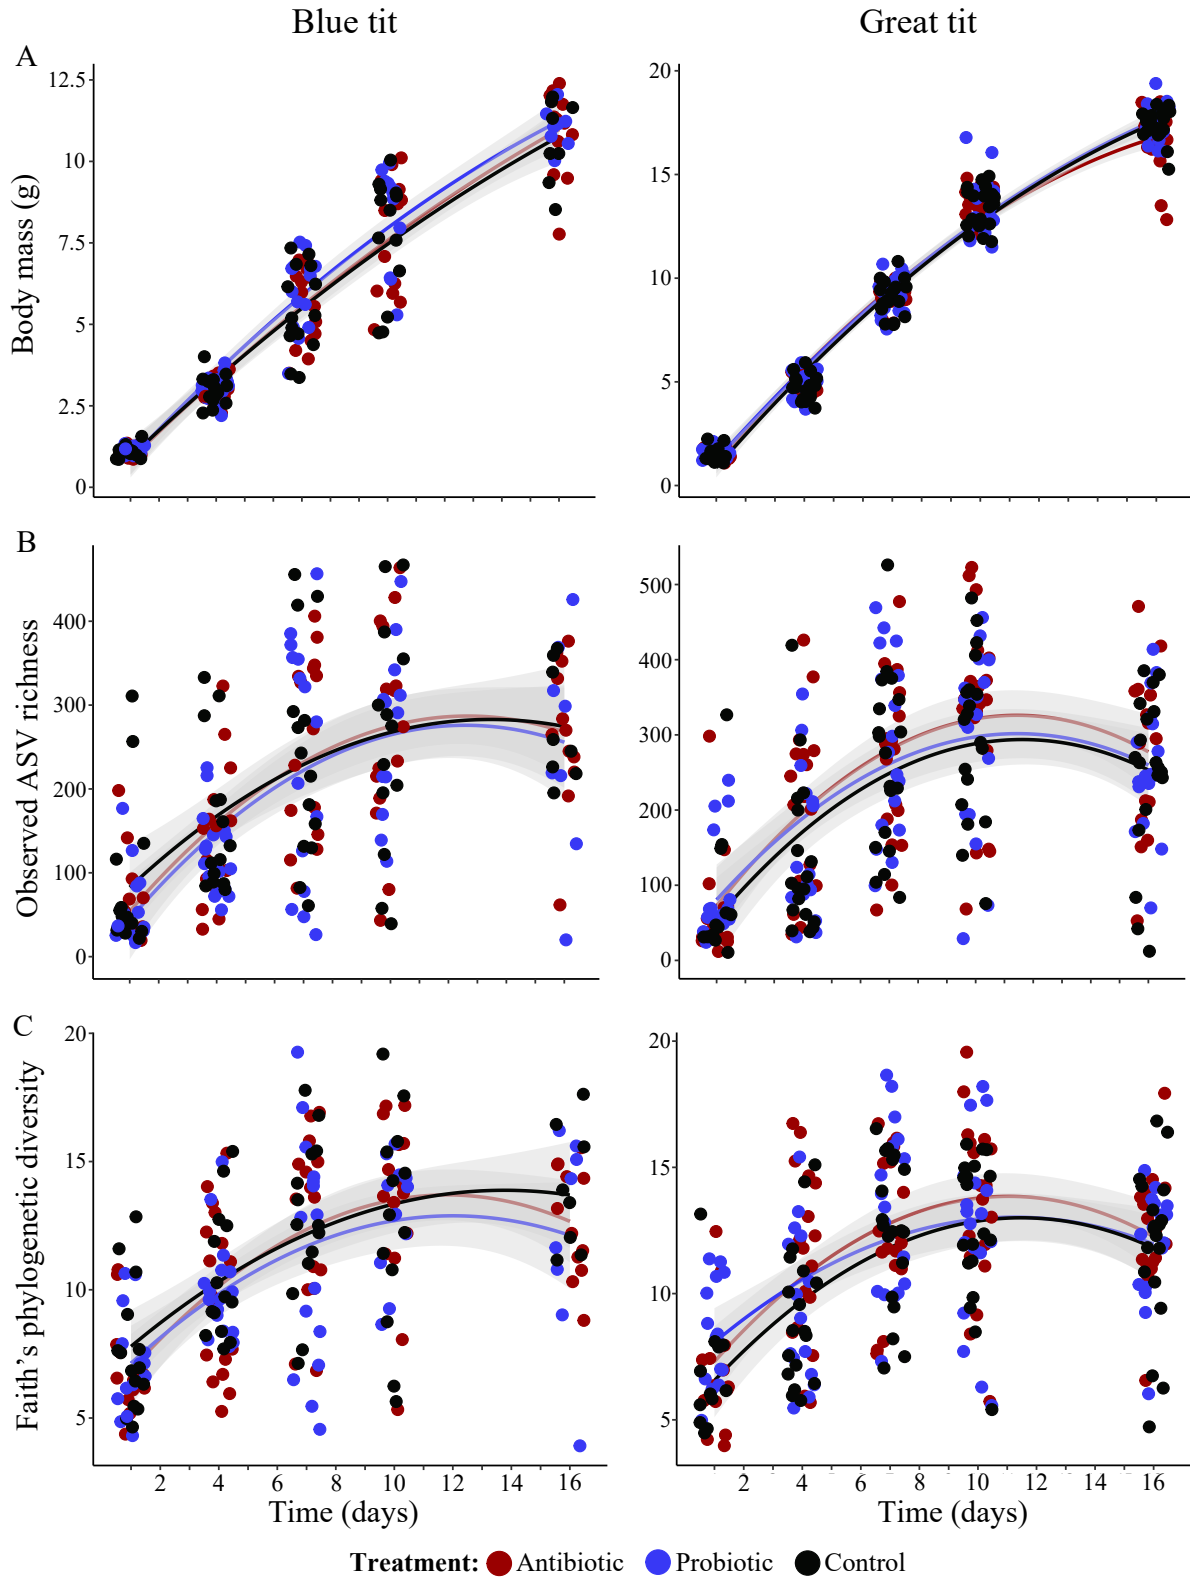

749

750 **Fig. 4. Nest environment has a stronger effect than antibiotic/probiotic treatments on**

751 **shaping the gut microbiomes of developing chicks.** Microbial communities of manipulated

752 chicks of Great (A, B) and Blue (C, D) tits. Individuals in A and C are colored according to the

753 treatment, while individuals in B and D are colored according to nest. Shapes indicate day of  
754 sampling across all four plots.

755

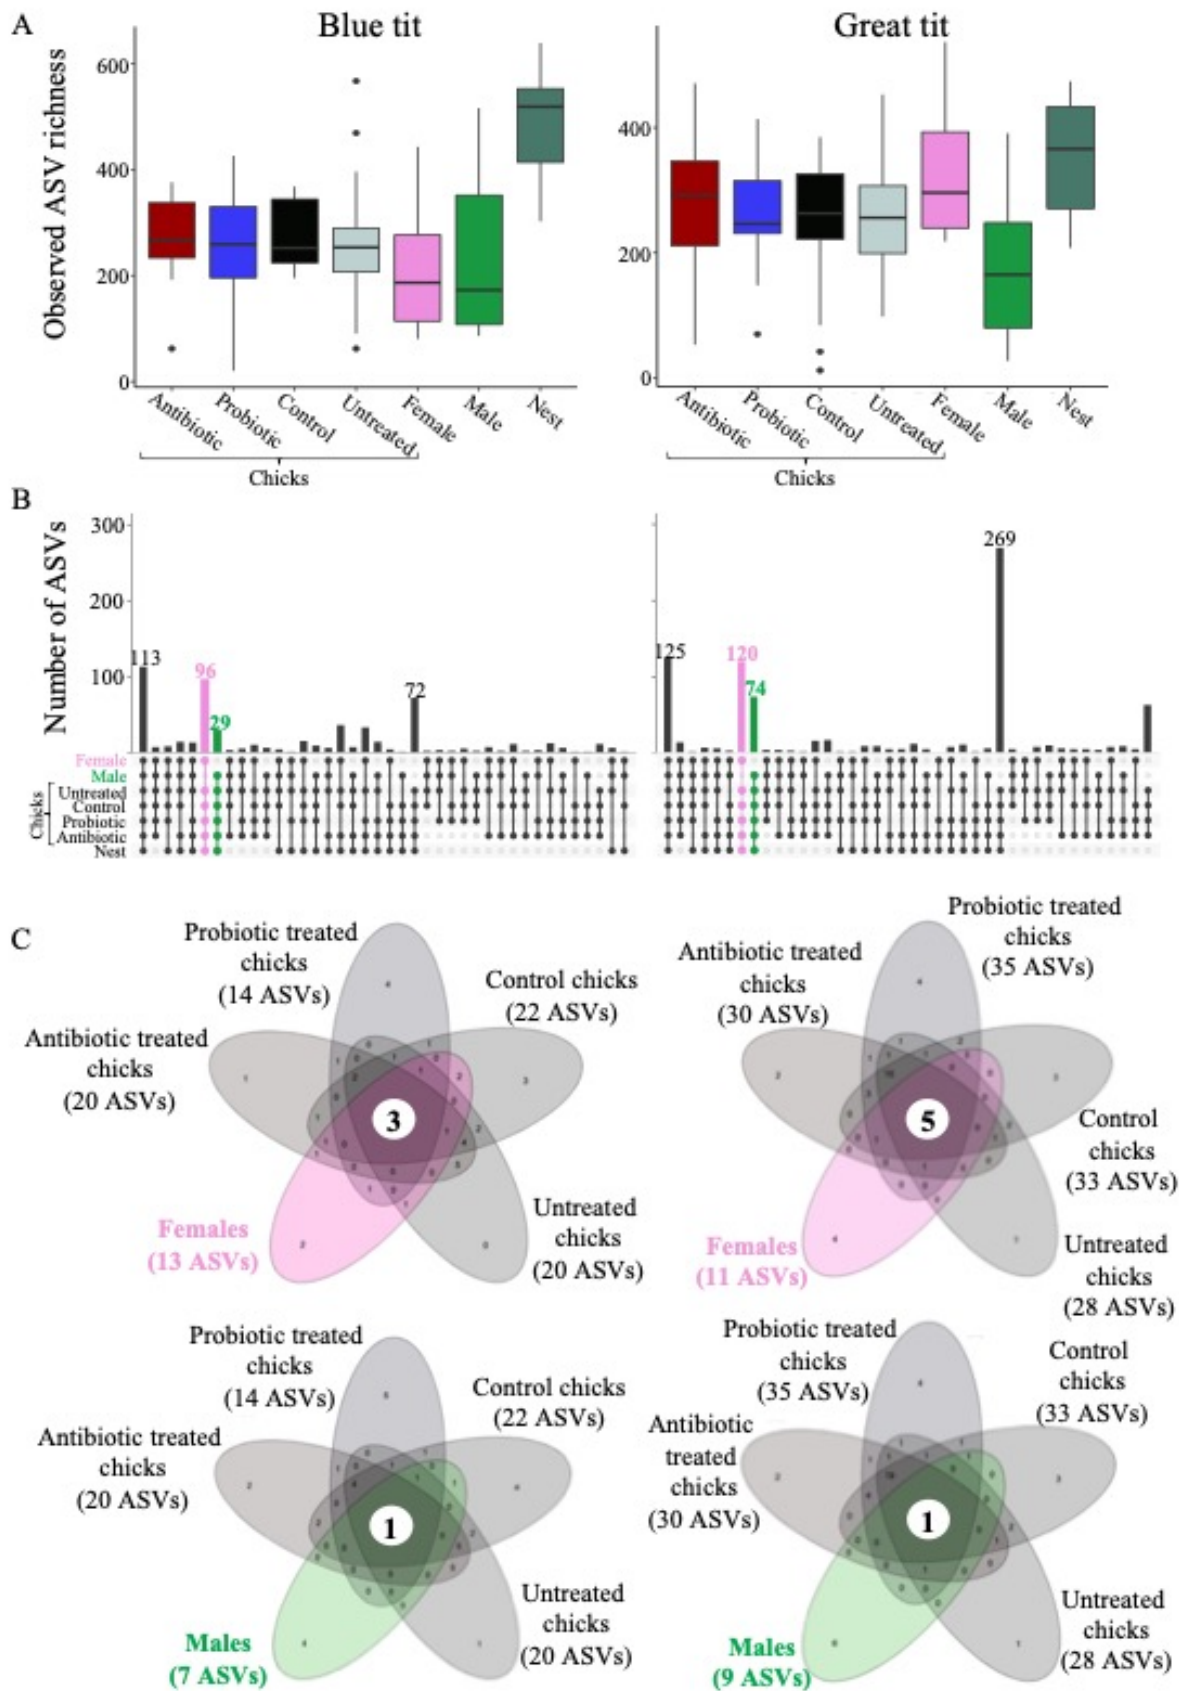

756

757 **Fig. 5. Alpha diversities of parent microbiomes did not differ from chicks, but maternal**

758 **microbiomes contributed notably to the composition of chick microbiomes.** (A) Box plots  
759 depicting the observed ASV richness in chicks and adults. (B) Upset plots showing the number  
760 of shared and unique ASVs found between chicks and adults. Unique ASVs found between  
761 chicks and female or male are indicated with colored bars. (C) Flower plots depicting the shared  
762 core microbiome between chicks and adults.  
763

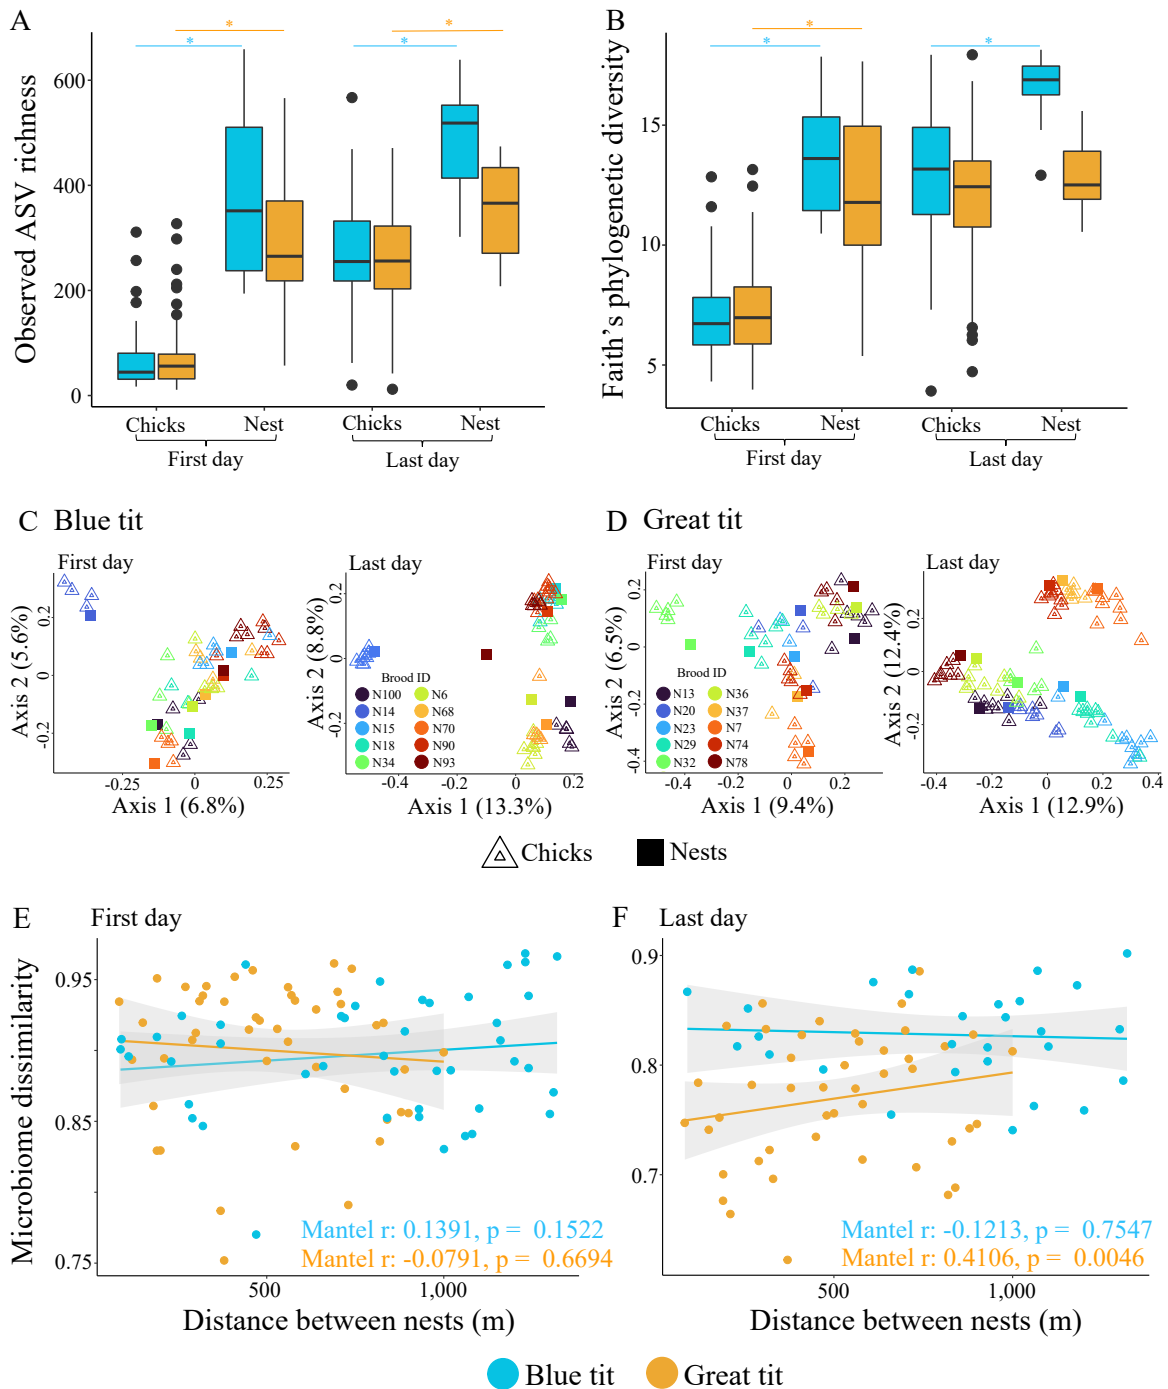

764

765 **Fig. 6. Nest microbiomes tend to influence cloacal microbiomes of chicks.** Observed ASV  
 766 richness (A) and Faith's phylogenetic diversity (B) of chick and nest microbiomes during first  
 767 and last sampling days. Statistical differences are indicated with asterisks. Ordination plot  
 768 depicting the compositional differences (measured with Bray-Curtis distances) in chick and  
 769 nest microbiomes during first and last sampling days of Blue (C) and Great (D) tits. Association

770 between distance among nests and average chick microbiome per nest in first (E) and last (F)  
771 sampling days. Mantel test statistics are given within each graph.
